# Supplementary material for: Poly-γ-glutamic acid coupled Pseudomonas putida cells surface-displaying metallothioneins: composited copper(ii) biosorption and inducible flocculation in aqueous solution
Source: Royal Society of Chemistry journal article supplement (doi:10.1039/c7ra01546a), 2017-01-01
Supplement: c7ra01546a1.pdf [file c7ra01546a1.pdf]

## Supplementary Information

### **Poly- $\gamma$ -glutamic acid coupled *Pseudomonas putida* cells surface-displaying metallothioneins: Composited copper(II) biosorption and inducible flocculation in aqueous solution**

Penggao Hu<sup>a</sup>, Zhongna Zhang<sup>a</sup>, Fei Shen<sup>a</sup>, Xun Yu<sup>a</sup>, Mingshun Li<sup>a</sup>, Hong  
Ni<sup>b</sup> and Lin Li<sup>\* a</sup>

<sup>a</sup> *State Key Laboratory of Agricultural Microbiology, College of Life Science and  
Technology, Huazhong Agricultural University, Wuhan 430070, China*

<sup>b</sup> *College of Life Sciences, Hubei University, Wuhan 430062, China*

\* Corresponding author. Phone: +86-27-8728 6952; Fax: +86-27-8728 0670; E-mail:

[lilin@mail.hzau.edu.cn](mailto:lilin@mail.hzau.edu.cn)

## Supplementary Tables

**Table S1.** Two-way ANOVA analysis of the Cu<sup>2+</sup> removal efficiency of MB546 and MB546-PGA at 0.05 significance level

|                 | <i>df</i> | Sum of squares | Mean square | <i>F</i> value | <i>P</i> value          |
|-----------------|-----------|----------------|-------------|----------------|-------------------------|
| Factor A        | 1         | 1627.500       | 1627.500    | 65.310**       | $3.082 \times 10^{-10}$ |
| Factor B        | 8         | 55637.825      | 6954.728    | 279.086**      | 0                       |
| Model           | 9         | 57265.324      | 6362.814    | 255.333**      | 0                       |
| Error           | 44        | 1096.466       | 24.920      | n/a            | n/a                     |
| Corrected total | 53        | 58361.790      | n/a         | n/a            | n/a                     |

**Table S2.** Fitting parameters for the pseudo-first-order kinetics

| <i>C</i> <sub>0</sub><br>(mg L <sup>-1</sup> ) | <i>k</i> <sub>1</sub><br>(min <sup>-1</sup> ) | <i>q</i> <sub>e</sub><br>(mg g <sup>-1</sup> ) | Standard<br>error of <i>lnq</i> <sub>e</sub> | Standard<br>error of <i>-k</i> <sub>1</sub> | <i>F</i> value | Prob> <i>F</i> | <i>R</i> <sup>2</sup> |
|------------------------------------------------|-----------------------------------------------|------------------------------------------------|----------------------------------------------|---------------------------------------------|----------------|----------------|-----------------------|
| 6.4                                            | 0.5849                                        | 9.3410                                         | 0.1360                                       | 0.1241                                      | 22.2363        | 0.00920        | 0.8094                |
| 12.8                                           | 0.5126                                        | 19.3918                                        | 0.0647                                       | 0.1089                                      | 22.1667        | 0.00925        | 0.8089                |
| 32                                             | 0.6078                                        | 47.3577                                        | 0.0913                                       | 0.0992                                      | 37.5516        | 0.00359        | 0.8797                |
| 64                                             | 0.5566                                        | 87.1369                                        | 0.1257                                       | 0.1082                                      | 26.4550        | 0.00678        | 0.8358                |
| 128                                            | 0.7135                                        | 178.1646                                       | 0.1682                                       | 0.1444                                      | 24.4285        | 0.00780        | 0.8241                |

**Table S3.** Fitting parameters for the pseudo-second-order kinetics

| <i>C</i> <sub>0</sub><br>(mg L <sup>-1</sup> ) | <i>k</i> <sub>2</sub><br>(g mg <sup>-1</sup> min <sup>-1</sup> ) | <i>q</i> <sub>e</sub><br>(mg g <sup>-1</sup> ) | Standard error<br>of <i>k</i> <sub>2</sub> <sup>-1</sup> <i>q</i> <sub>e</sub> <sup>-2</sup> | Standard<br>error of <i>q</i> <sub>e</sub> <sup>-1</sup> | <i>F</i> value | Prob> <i>F</i>        | <i>R</i> <sup>2</sup> |
|------------------------------------------------|------------------------------------------------------------------|------------------------------------------------|----------------------------------------------------------------------------------------------|----------------------------------------------------------|----------------|-----------------------|-----------------------|
| 6.4                                            | 0.1541                                                           | 10.4037                                        | 0.0188                                                                                       | 0.00606                                                  | 251.96         | $9.21 \times 10^{-5}$ | 0.9805                |
| 12.8                                           | 0.0749                                                           | 19.8886                                        | 0.0074                                                                                       | $5.3171 \times 10^{-4}$                                  | 8943.74        | $7.50 \times 10^{-8}$ | 0.9994                |
| 32                                             | 0.0396                                                           | 49.1400                                        | 0.0034                                                                                       | $5.3237 \times 10^{-4}$                                  | 1460.61        | $2.80 \times 10^{-6}$ | 0.9966                |
| 64                                             | 0.0144                                                           | 97.4659                                        | 0.0015                                                                                       | $3.3157 \times 10^{-4}$                                  | 957.06         | $6.51 \times 10^{-6}$ | 0.9948                |
| 128                                            | 0.0089                                                           | 194.1748                                       | $8.8 \times 10^{-4}$                                                                         | $1.5708 \times 10^{-4}$                                  | 1073.41        | $5.18 \times 10^{-6}$ | 0.9954                |

**Table S4.** Fitting parameters of the Freundlich isotherm model for Cu<sup>2+</sup> biosorption by MB546-PGA

| $K_f$ | $n$   | Standard error of $\ln K_f$ | Standard error of $n^{-1}$ | $F$ value | Prob> $F$             | $R^2$  |
|-------|-------|-----------------------------|----------------------------|-----------|-----------------------|--------|
| 23.16 | 1.305 | 0.05242                     | 0.02412                    | 1009.71   | $6.85 \times 10^{-5}$ | 0.9961 |

**Table S5.** Fitting parameters of the Langmuir isotherm model for Cu<sup>2+</sup> biosorption by MB546-PGA

| $K_s$ (mg L <sup>-1</sup> ) | $Q_{max}$ (mg g <sup>-1</sup> ) | Standard error<br>of $Q_{max}^{-1}$ | Standard error<br>of $K_s^{-1} Q_{max}^{-1}$ | $F$ value | Prob> $F$             | $R^2$  |
|-----------------------------|---------------------------------|-------------------------------------|----------------------------------------------|-----------|-----------------------|--------|
| $2.012 \times 10^{-4}$      | 145.99                          | 0.002                               | 0.00183                                      | 257.72    | $5.26 \times 10^{-4}$ | 0.9847 |

**Table S6.** Plasmids and oligonucleotide primers used in this study

| Plasmids or primers                  | Phenotypes or sequences <sup>a</sup>                                                                                                                                         | Sources or references |
|--------------------------------------|------------------------------------------------------------------------------------------------------------------------------------------------------------------------------|-----------------------|
| Plasmids                             |                                                                                                                                                                              |                       |
| pTrcHis B                            | Amp <sup>r</sup> , <i>E. coli</i> expression vector, 4404 bp                                                                                                                 | Invitrogen            |
| pYNP                                 | Cb <sup>r</sup> , <i>Pseudomonas</i> expression vector harboring the promoter <i>P<sub>oprL</sub></i> , 6154 bp                                                              | [1]                   |
| pYN2S                                | Cb <sup>r</sup> , <i>Pseudomonas</i> expression vector harboring the <i>P<sub>oprL</sub>-inaK-N-smtA-smtA</i> fusion gene, 5763 bp                                           | [2]                   |
| pMB109                               | Amp <sup>r</sup> , an <i>E. coli</i> plasmid expressing the fusion gene ( <i>inaQ-N</i> ) <sub>2</sub> / <i>gfp</i> ; 6071 bp                                                | [3]                   |
| pMB541                               | Amp <sup>r</sup> , a pMB109 derivative harboring the fusion gene ( <i>inaQ-N</i> ) <sub>2</sub> - <i>glnBP</i> , 6162 bp                                                     | This study            |
| pMB542                               | Amp <sup>r</sup> , a pTrcHis B derivative harboring the fusion gene ( <i>inaQ-N</i> ) <sub>2</sub> - <i>glnBP</i> , 6185 bp                                                  | This study            |
| pMB544                               | Amp <sup>r</sup> , a pMB542 derivative harboring the fusion gene ( <i>inaQ-N</i> ) <sub>2</sub> - <i>glnBP</i> -( <i>smtA</i> ) <sub>2</sub> , 6525 bp                       | This study            |
| pMB545                               | Cb <sup>r</sup> , a pYNP-derived <i>Pseudomonas</i> plasmid expressing the fusion gene ( <i>inaQ-N</i> ) <sub>2</sub> - <i>glnBP</i> -( <i>smtA</i> ) <sub>2</sub> , 7124 bp | This study            |
| Oligonucleotide primers <sup>b</sup> |                                                                                                                                                                              |                       |
| <i>glnBP</i> -F                      | 5'-GGAAGATCTATGCTTAAAATGAAAAAG-3' ( <i>Bgl</i> II)                                                                                                                           |                       |
| <i>glnBP</i> 1-R                     | 5'-GTCGGAATTCCTTCTCTTGTGTTTTGCC-3' ( <i>Eco</i> RI)                                                                                                                          |                       |
| <i>inaQ-N</i> -F                     | 5'-AGTCCATGGATCTCGACAAGGCGTT-3' ( <i>Nco</i> I)                                                                                                                              |                       |
| <i>glnBP</i> 2-R                     | 5'-CTACTGCAGCTTCTCTTGTGTTTTGC-3' ( <i>Pst</i> I)                                                                                                                             |                       |
| <i>smtA</i> -F                       | 5'-AGTTGGTACCATGACCTCAACAACG-3' ( <i>Kpn</i> I)                                                                                                                              |                       |
| <i>smtA</i> -R                       | 5'-GAAAGAATTCATTAGCCGTGGCAGT-3' ( <i>Eco</i> RI)                                                                                                                             |                       |

Note: <sup>a</sup> Amp<sup>r</sup>, ampicillin resistance; Cb<sup>r</sup>, carbenicillin resistance; *P<sub>oprL</sub>*, the constitutive promoter of pYNP in *Pseudomonas* strains; *inaK-N*, N-terminal domain of ice-nucleating gene *inaK*; *glnBP*, glutamine-binding protein gene; *inaQ-N*, N-terminal domain of ice-nucleating gene *inaQ*; *smtA*, cyanobacterial metallothionein protein gene.

<sup>b</sup> The underlined sequences indicates the restriction enzyme sites.

#### References

- [1] T. Ye, C. Yao, Q. Li, H. Zhang and L. Li, Construction and characterization of *Pseudomonas* shuttle expression vector pYMB03, *Chin. J. Appl. Environ. Biol.* 14 (2008) 528–533.
- [2] H. Ni, Z. Xiong, T. Ye, Z. Zhang, X. Ma and L. Li, Biosorption of copper(II) from aqueous solutions using volcanic rock matrix-immobilized *Pseudomonas putida* cells with surface-displayed cyanobacterial metallothioneins, *Chem. Eng. J.* 204–206 (2012) 264–271.
- [3] Q. Li, Q. Yan, J. Chen, Y. He, J. Wang, H. Zhang, Z. Yu and L. Li, Molecular characterization of an ice nucleation protein variant (InaQ) from *Pseudomonas syringae* and the analysis of its transmembrane transport activity in *Escherichia coli*, *Int. J. Biol. Sci.* 8 (2012) 1097–1108.

## Supplementary Figures

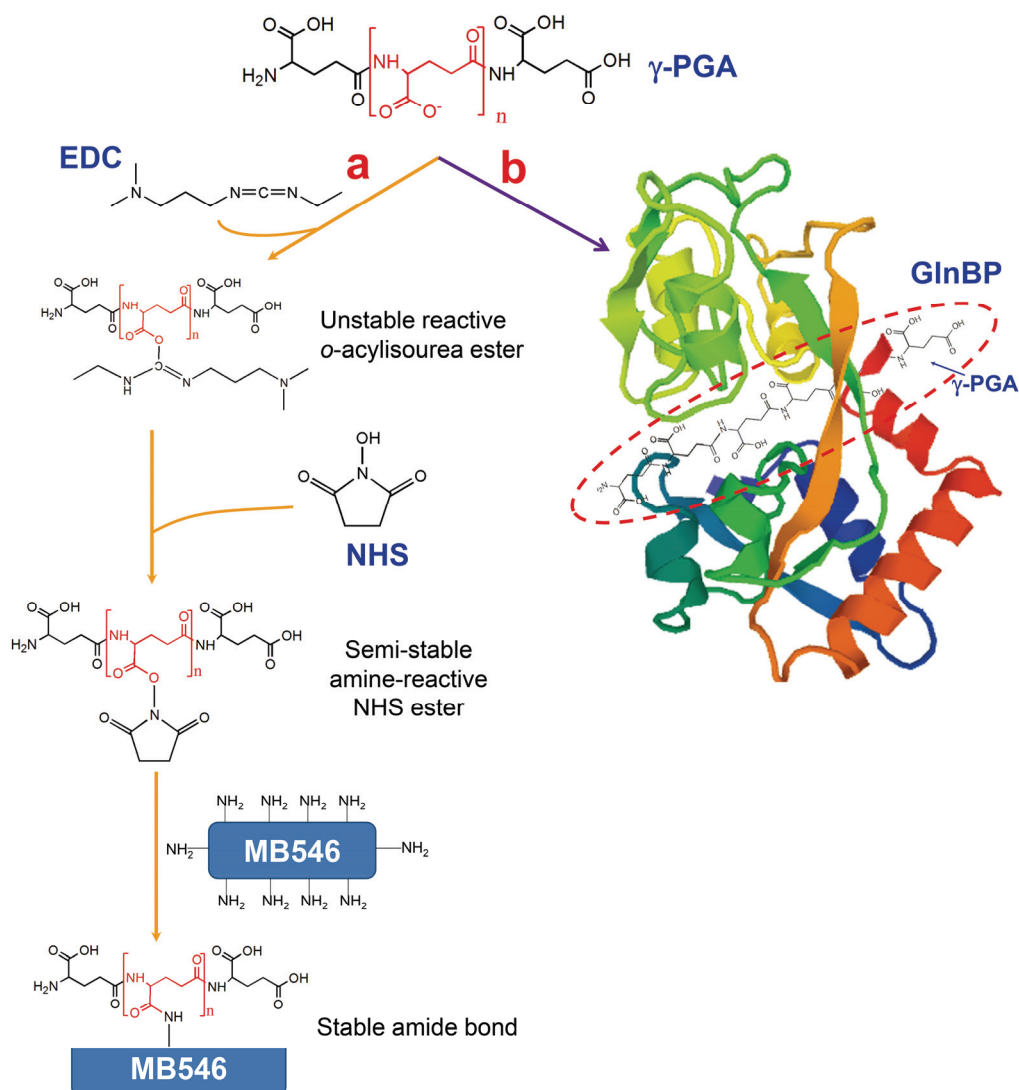

**Figure S1.** Strategies for the binding of  $\gamma$ -PGA and GlnBP. (a), Formation of amide bonds by activated  $\gamma$ -PGA and the amino groups of the amino acids of GlnBP; (b), Binding of the Gln ligand to the cleft between the two domains of GlnBP. Abbreviations:  $\gamma$ -PGA,  $\gamma$ -polyglutamic acid; GlnBP, glutamine-binding protein; EDC, 1-(3-Dimethylaminopropyl)-3-Ethylcarbodiimide; NHS, *N*-Hydroxysuccinimide.

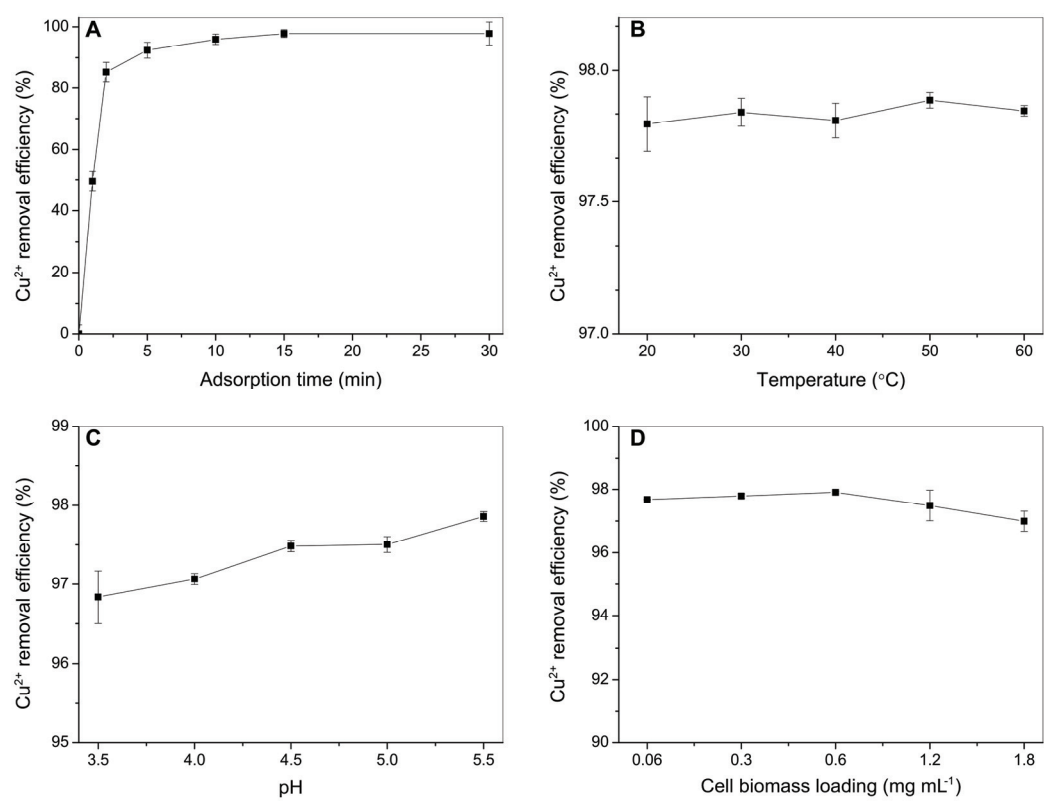

**Figure S2.** Effects of the adsorption time, pH, temperature and cell biomass loading on the biosorption capacity of  $\text{Cu}^{2+}$  by MB546-PGA.

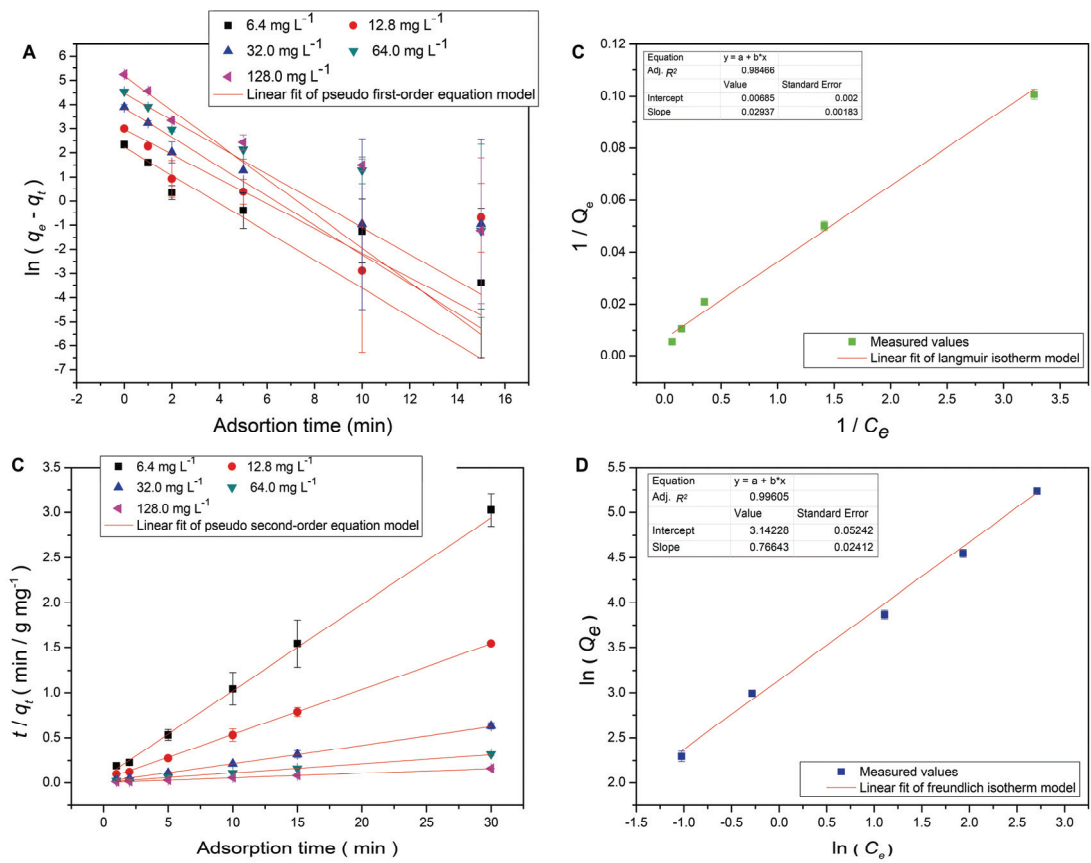

**Figure S3.** The pseudo-first-order equation (A) and the pseudo-second-order equation (B) modeled sorption data over a time course, and Freundlich isotherm (C) and Langmuir isotherm (D) plots of the MB546-PGA biocomposite.

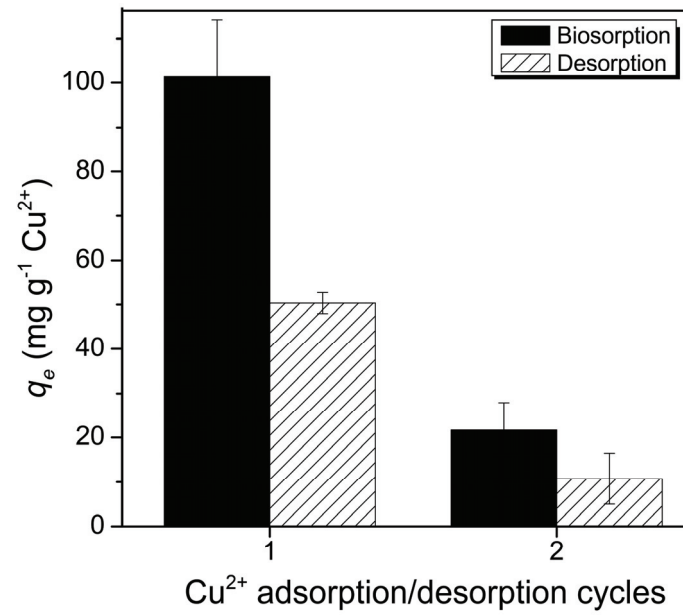

**Figure S4.** Cu<sup>2+</sup> adsorption capacity and Cu<sup>2+</sup> desorption capacity after continuously repeated adsorption and desorption cycles.



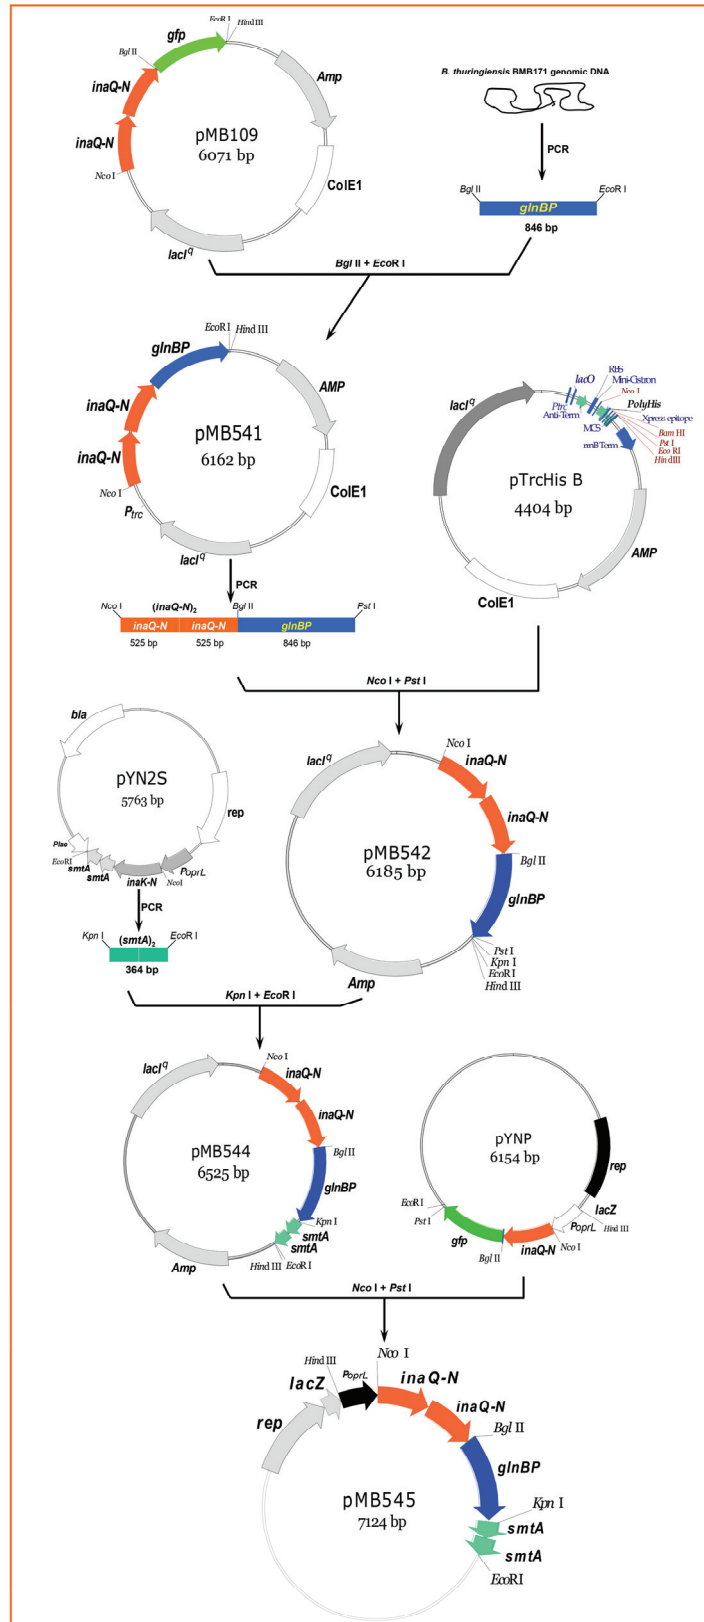

**Fig. S5.** Schematic illustration of the construction of the recombinant pMB541, pMB542, pMB544, and pMB545 plasmids.
